# Supplementary material for: Syndecan-3 as a Novel Biomarker in Alzheimer’s Disease
Source: MDPI journal article supplement (doi:10.3390/ijms23063407), 2022-03-21
Supplement: s1 [file s1]

# Supplementary Materials: Syndecan-3 as a novel biomarker in Alzheimer's disease

Anett Hudák <sup>1</sup>, Annamária Letoha <sup>2</sup>, Csaba Vizler <sup>3</sup>, László Szilák <sup>1</sup>, and Tamás Letoha <sup>1</sup>

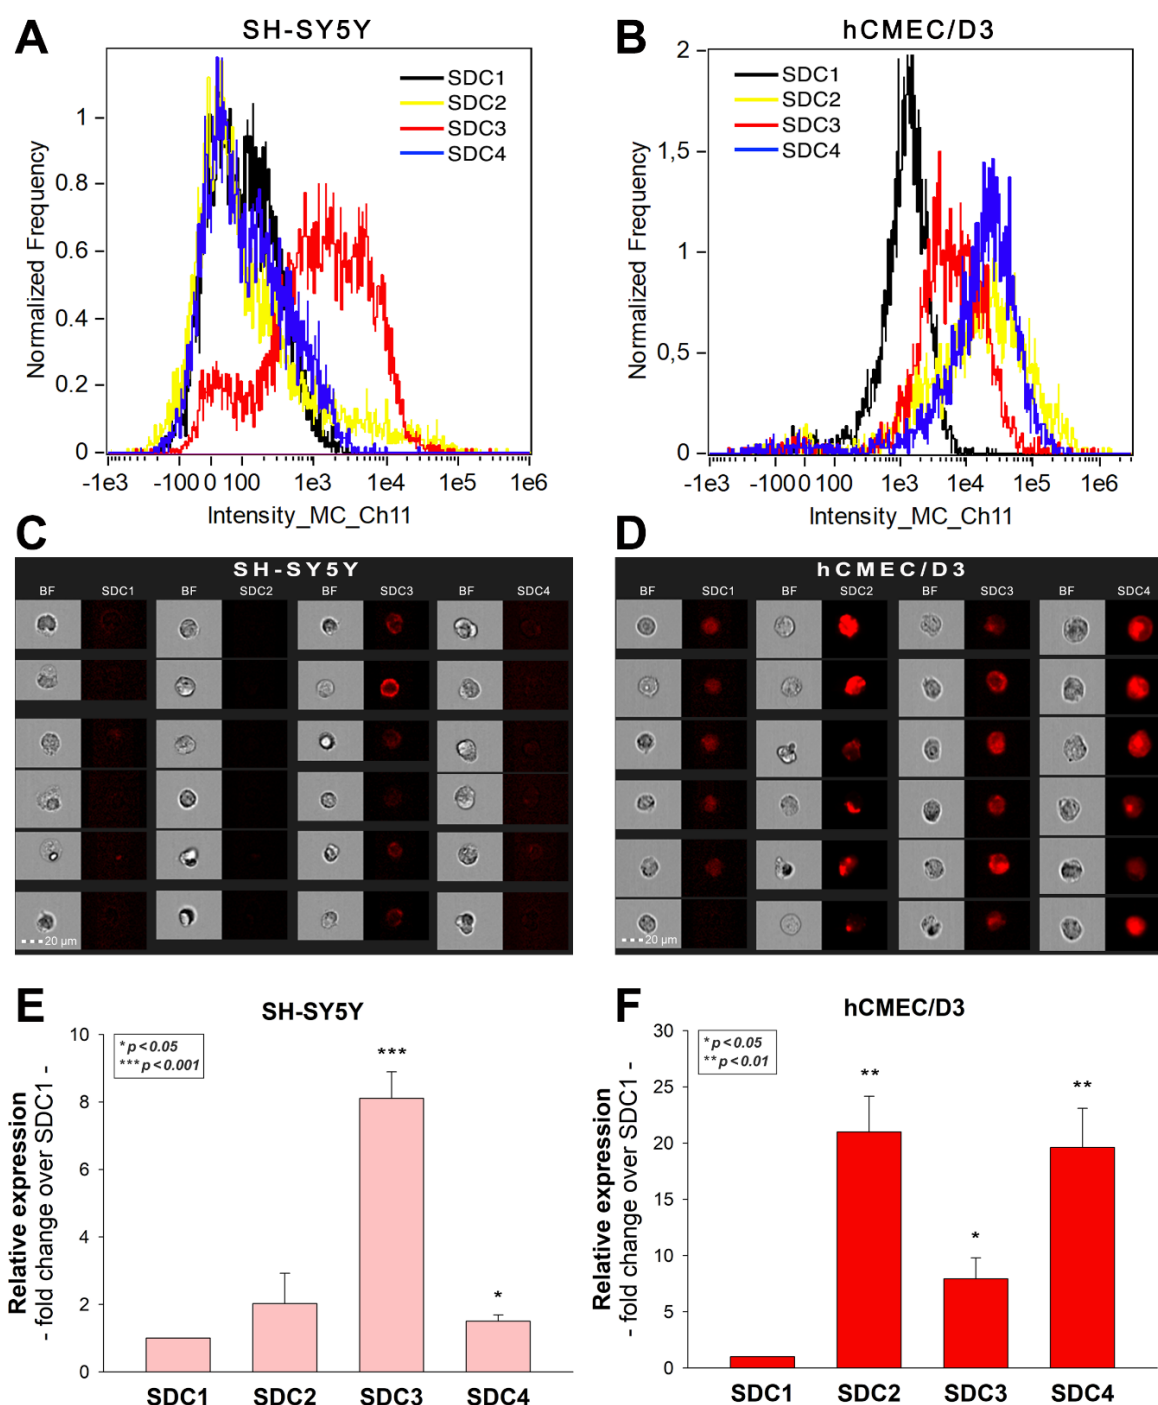

**Figure S1.** SDC expression profile of SH-SY5Y and hCMEC/D3 cells. SDC1-4 expression of SH-SY5Y and hCMEC/D3 cells was analyzed with imaging flow cytometry using APC-labeled anti-SDC antibodies specific for each SDC isoform. (A,B) Representative flow cytometry histograms showing

the SDC1-4 expression of SH-SY5Y and hCMEC/D3 cells. **(C,D)** Brightfield (BF) and fluorescent cellular images of SH-SY5Y and hCMEC/D3 treated with the respective SDC antibodies. Scale bar = 20  $\mu\text{m}$ . **(E,F)** Detected SDC expression levels were normalized to that of SDC1 as standard. The bars represent the mean + SEM of three independent experiments. Statistical significance vs. SDC1 expression levels (standards) was assessed with analysis of variance (ANOVA). \* $p < 0.05$ ; \*\* $p < 0.01$ ; \*\*\* $p < 0.001$ .
